# Supplementary material for: Type of organic fertilizer rather than organic amendment per se increases abundance of soil biota
Source: PeerJ. 2021 May 7;9:e11204. doi: 10.7717/peerj.11204 (PMC8109005; doi:10.7717/peerj.11204)
Supplement: Supplemental Information 3 [file peerj-09-11204-s003.xlsx]

## Sheet: Raw data
Plot	ID	Block	Treatment	pH_2014	TotC_2014	TotN_2014	C.N_2014	Fun.Bac	Fun(cop/gDW)	Bact(cop/gDW)	RF	FF	BF	OM	PRED	Tot_nem	Ew.m2	A.tot.m2	L.tot.m2	DW_Ew_g.m2	Mite.juv.1m2	DW.Mite.juv.1m2	M.Ori.Tot.1m2	DW.Ori.Tot.1m2	M.Meso.1m2	DW.M.Meso.1m2	M.Prostig.1m2	DW.M.Prostig.1m2	M.Astig.1m2	DW.M.Astig.1m2	Mite.Tot.1m2	DW.Mites.tot.1m2	C.PoduTot.1m2	DW.PoduTot.1m2	C.EntomoTot.1m2	DW.C.EntomoTot.1m2	C.SympTot.1m2	DW.C.SympTot.1m2	CollTot.1m2	DW.Coll.1m2	DW.Meso	CollCWB	MitesCWB
1	1a	1	(NH4)2SO4.	6.02	2.1383	0.18353	11.651	0.143297	397005250	2770507500	1.73607	5.69046	3.5686	1.35028	0.192897	12.5383	44.4444	44.4444	0	0.336667	0	0	0	0	100	650	0	0	0	0	100	650	400	396.55	600	538.566	0	0	1000	935.117	1585.12	0.935117	6.5
1	1b	1	(NH4)2SO4.																		0	0	0	0	700	4550	0	0	0	0	700	4550	300	81.689	100	103.799	200	227.459	600	412.947	4962.95	0.688245	6.5
1	1c	1	(NH4)2SO4.																		0	0	0	0	600	3900	100	24	0	0	700	3924	500	444.425	200	196.673	0	0	700	641.098	4565.1	0.915855	5.60571
1	1d	1	(NH4)2SO4.																		100	40	0	0	600	3900	100	24	0	0	800	3964	300	228.096	700	508.379	0	0	1000	736.476	4700.48	0.736476	4.955
2	2a	1	FYM	6.38	2.371	0.19888	11.9218	0.108515	368503500	3395867500	0.769685	3.07874	1.79593	0.171041	0.0855206	5.90092	266.667	233.333	33.3333	5.66222	400	160	0	0	2900	18850	500	120	700	511	4500	19641	1900	1129.71	500	438.475	100	127.435	2500	1695.62	21336.6	0.678249	4.36467
2	2b	1	FYM																		500	200	0	0	3100	20150	200	48	100	73	3900	20471	3900	2909.4	1700	1601.8	200	280.087	5800	4791.28	25262.3	0.826083	5.24897
2	2c	1	FYM																		800	320	0	0	1300	8450	200	48	0	0	2300	8818	2400	1724.02	2700	1849	100	98.7164	5200	3671.74	12489.7	0.706103	3.83391
2	2d	1	FYM																		900	360	0	0	2000	13000	200	48	0	0	3100	13408	2000	2069.01	1800	1303.71	0	0	3800	3372.72	16780.7	0.887558	4.32516
3	3a	1	grass.hay.	6.27	2.1258	0.18051	11.7766	0.0853854	2.77054e+08	3.24474e+09	0.206079	1.64863	0.309119	0	0.10304	2.26687	144.444	122.222	22.2222	2.08778	1200	480	0	0	0	0	900	216	300	219	2400	915	1500	532.914	3100	1865.93	100	222.913	4700	2621.76	3536.76	0.557821	0.38125
3	3b	1	grass.hay.																		2000	800	0	0	0	0	500	120	0	0	2500	920	100	53.3059	100	58.0111	0	0	200	111.317	1031.32	0.556585	0.368
3	3c	1	grass.hay.																		600	240	0	0	600	3900	0	0	0	0	1200	4140	400	108.919	800	464.089	0	0	1200	573.008	4713.01	0.477506	3.45
3	3d	1	grass.hay.																		600	240	0	0	400	2600	100	24	0	0	1100	2864	300	81.689	100	99.8998	100	98.7164	500	280.305	3144.31	0.56061	2.60364
5	5a	1	Unfertilised	6.25	1.8847	0.15966	11.8045	0.0765537	1.38682e+08	1.81157e+09	0.099531	2.68734	0.796248	0.199062	0.099531	3.88171	11.1111	11.1111	0	0.05	1600	640	0	0	100	650	100	24	500	365	2300	1679	2800	990.988	300	344.055	0	0	3100	1335.04	3014.04	0.430659	0.73
5	5b	1	Unfertilised																		1600	640	400	350	0	0	300	72	500	365	2800	1427	2800	2433.45	1500	827.027	200	197.433	4500	3457.91	4884.91	0.768424	0.509643
5	5c	1	Unfertilised																		0	0	0	0	100	650	400	96	0	0	500	746	500	92.1395	1000	794.224	0	0	1500	886.363	1632.36	0.590909	1.492
5	5d	1	Unfertilised																		200	80	0	0	0	0	0	0	0	0	200	80	1700	964.391	600	408	0	0	2300	1372.39	1452.39	0.596692	0.4
7	7a	1	sewage.sludge.	6.1	2.3373	0.21079	11.0883	0.0732873	2.18904e+08	2.98693e+09	0.855092	4.27546	2.24462	0.427546	0.213773	8.01649	77.7778	77.7778	0	0.217778	500	200	0	0	100	650	0	0	0	0	600	850	400	171.862	200	160.036	0	0	600	331.898	1181.9	0.553163	1.41667
7	7b	1	sewage.sludge.																		100	40	0	0	200	1300	100	24	200	146	600	1510	8200	8482.94	1100	298.749	200	162.284	9500	8943.97	10454	0.941471	2.51667
7	7c	1	sewage.sludge.																		1100	440	0	0	600	3900	200	48	0	0	1900	4388	2900	789.66	1000	755	0	0	3900	1544.66	5932.66	0.396067	2.30947
7	7d	1	sewage.sludge.																		700	280	0	0	200	1300	200	48	100	73	1200	1701	1000	272.297	1000	981.915	0	0	2000	1254.21	2955.21	0.627106	1.4175
8	8a	1	house-hold.compost	6.46	2.5847	0.23864	10.831	0.077487	2.19951e+08	2.83856e+09	1.03435	4.79563	0.752255	0.282096	0.470159	7.33449	66.6667	66.6667	0	2.33556	0	0	0	0	0	0	0	0	100	73	100	73	900	671.4	0	0	0	0	900	671.4	744.4	0.746	0.73
8	8b	1	house-hold.compost																		200	80	0	0	900	5850	200	48	200	146	1500	6124	2900	2318.99	600	244.355	100	98.7164	3600	2662.06	8786.06	0.739461	4.08267
8	8c	1	house-hold.compost																		100	40	0	0	300	1950	0	0	0	0	400	1990	600	110.567	100	46.8445	300	420.131	1000	577.543	2567.54	0.577543	4.975
8	8s	1	house-hold.compost																		400	160	0	0	700	4550	100	24	0	0	1200	4734	500	176.894	1200	1052.27	200	197.433	1900	1426.6	6160.6	0.750841	3.945
9	9a	1	Ca(NO3)2.	6.44	1.9028	0.1618	11.7602	0.0604306	1.56058e+08	2.58243e+09	0.501077	3.80819	2.30495	0.501077	0	7.1153	100	100	0	0.648889	200	80	100	1000	100	650	400	96	0	0	800	1826	4600	2302.87	1300	603.323	100	98.7164	6000	3004.91	4830.91	0.500818	2.2825
9	9b	1	Ca(NO3)2.																		0	0	0	0	0	0	0	0	0	0	0	0	1900	1965.56	400	368.527	0	0	2300	2334.09	2334.09	1.01482	0
9	9c	1	Ca(NO3)2.																		0	0	0	0	200	1300	0	0	100	73	300	1373	300	128.897	400	291.806	0	0	700	420.703	1793.7	0.601004	4.57667
9	9d	1	Ca(NO3)2.																		700	280	0	0	100	650	0	0	0	0	800	930	1000	353.788	400	187.378	0	0	1400	541.166	1471.17	0.386547	1.1625
10	10a	2	Unfertilised	6.34	2.0807	0.18241	11.4067	0.0510025	170047500	3334100000	0.615339	3.1646	1.5823	0.351623	0.0879056	5.80177	133.333	133.333	0	3.72222	500	200	0	0	0	0	200	48	0	0	700	248	1200	756.17	500	482.259	0	0	1700	1238.43	1486.43	0.728488	0.354286
10	10b	2	Unfertilised																		200	80	0	0	0	0	100	24	200	146	500	250	500	399.826	800	511.961	100	127.435	1400	1039.22	1289.22	0.742301	0.5
10	10c	2	Unfertilised																		1000	400	0	0	300	1950	100	24	100	73	1500	2447	1300	650.811	400	210.369	0	0	1700	861.18	3308.18	0.506576	1.63133
10	10d	2	Unfertilised																		100	40	100	20	100	650	300	72	0	0	600	782	800	283.031	200	116.022	0	0	1000	399.053	1181.05	0.399053	1.30333
11	11a	2	house-hold.compost	6.45	2.5594	0.23318	10.9761	0.0558855	248420250	4.44517e+09	1.09492	5.01838	0.547459	0.27373	0	6.93448	77.7778	77.7778	0	0.888889	600	240	0	0	200	1300	0	0	0	0	800	1540	2000	958.88	0	0	0	0	2000	958.88	2498.88	0.47944	1.925
11	11b	2	house-hold.compost																		400	160	0	0	400	2600	0	0	0	0	800	2760	4600	4677.51	300	189.411	0	0	4900	4866.92	7626.92	0.993249	3.45
11	11c	2	house-hold.compost																		0	0	0	0	500	3250	0	0	0	0	500	3250	0	0	0	0	0	0	0	0	3250	0	6.5
11	11d	2	house-hold.compost																		100	40	0	0	400	2600	0	0	100	73	600	2713	200	36.8558	0	0	0	0	200	36.8558	2749.86	0.184279	4.52167
12	12a	2	grass.hay.	6.24	2.0966	0.18407	11.3902	0.0765126	3.28332e+08	4.29121e+09	0.611808	7.5165	1.83542	0.349604	0.437006	10.7503	222.222	211.111	11.1111	2.98111	700	280	0	0	400	2600	0	0	400	292	1500	3172	1200	680.746	300	165.804	0	0	1500	846.55	4018.55	0.564367	2.11467
12	12b	2	grass.hay.																		1600	640	0	0	200	1300	0	0	800	584	2600	2524	600	257.793	0	0	0	0	600	257.793	2781.79	0.429655	0.970769
12	12c	2	grass.hay.																		700	280	0	0	700	4550	0	0	300	219	1700	5049	300	-4.86238	0	0	0	0	300	-4.86238	5044.14	-0.0162079	2.97
12	12s	2	grass.hay.																		0	0	0	0	0	0	0	0	0	0	0	0	400	35.4393	0	0	0	0	400	35.4393	35.4393	0.0885983	0
15	15a	2	FYM	6.07	2.4269	0.20091	12.0795	0.114749	3.69258e+08	3.21798e+09	0.799766	11.0968	1.6995	0.499854	0.599824	14.6957	255.556	233.333	22.2222	3.53778	1200	480	100	1000	200	1300	400	96	100	73	2000	2949	6100	6047.39	1600	1460.95	100	98.7164	7800	7607.06	10556.1	0.975264	1.4745
15	15b	2	FYM																		2900	1160	300	2170	500	3250	1200	288	400	292	5300	7160	7100	7301.03	3600	3198.83	100	98.7164	10800	10598.6	17758.6	0.98135	1.35094
15	15c	2	FYM																		100	40	0	0	1200	7800	200	48	200	146	1700	8034	400	218.657	500	490.872	0	0	900	709.529	8743.53	0.788365	4.72588
15	15d	2	FYM																		400	160	0	0	600	3900	0	0	0	0	1000	4060	400	341.265	300	263.732	0	0	700	604.998	4665	0.864282	4.06
16	16a	2	sewage.sludge.	5.8	2.4285	0.20896	11.6218	0.0860366	364038000	4231200000	0.179328	10.67	2.5106	0.537985	0	13.8979	288.889	266.667	22.2222	4.54222	600	240	0	0	100	650	0	0	300	219	1000	1109	5800	5999.68	200	180.835	100	127.435	6100	6307.95	7416.95	1.03409	1.109
16	16b	2	sewage.sludge.																		4400	1760	100	1000	400	2600	0	0	200	146	5100	5506	11000	11379.6	2100	1909.43	500	493.582	13600	13782.6	19288.6	1.01342	1.07961
16	16c	2	sewage.sludge.																		700	280	300	240	0	0	0	0	0	0	1000	520	1200	851.306	300	238.795	0	0	1500	1090.1	1610.1	0.726734	0.52
16	16d	2	sewage.sludge.																		500	200	0	0	400	2600	0	0	0	0	900	2800	900	354.264	2000	1948.18	300	246.361	3200	2548.81	5348.81	0.796502	3.11111
17	17a	2	(NH4)2SO4.	5.54	2.1533	0.18057	11.925	0.0881122	2.6732e+08	3.03386e+09	0.369204	9.7839	2.03062	0.0923009	0.184602	12.4606	55.5556	44.4444	11.1111	2.44333	3300	1320	0	0	200	1300	0	0	0	0	3500	2620	6800	6734.97	1300	658.759	300	487.754	8400	7881.48	10501.5	0.938272	0.748571
17	17b	2	(NH4)2SO4.																		3200	1280	400	500	1300	8450	0	0	100	73	5000	10303	11900	12253.7	900	830.008	600	764.613	13400	13848.4	24151.4	1.03346	2.0606
17	17c	2	(NH4)2SO4.																		100	40	100	170	200	1300	800	192	0	0	1200	1702	1200	600.749	1400	1236.16	0	0	2600	1836.91	3538.91	0.706504	1.41833
17	17s	2	(NH4)2SO4.																		700	280	200	220	1000	6500	900	216	100	73	2900	7289	2100	1256.07	6000	3611.35	200	226.152	8300	5093.57	12382.6	0.613684	2.51345
18	18a	2	Ca(NO3)2.	6.17	2.0464	0.16944	12.0774	0.0660757	1.93911e+08	2.93468e+09	0.180032	8.46152	3.06055	0.270048	0.990178	12.9623	44.4444	44.4444	0	1.24333	500	200	200	220	200	1300	400	96	0	0	1300	1816	5400	6026.38	1300	760.273	0	0	6700	6786.65	8602.65	1.01293	1.39692
18	18b	2	Ca(NO3)2.																		100	40	0	0	0	0	0	0	0	0	100	40	3200	3443.22	500	385.18	200	254.871	3900	4083.27	4123.27	1.04699	0.4
18	18c	2	Ca(NO3)2.																		0	0	200	340	600	3900	100	24	0	0	900	4264	800	214.828	800	505.097	0	0	1600	719.924	4983.92	0.449953	4.73778
18	18d	2	Ca(NO3)2.																		200	80	0	0	100	650	300	72	0	0	600	802	400	344.093	800	743.465	100	172.751	1300	1260.31	2062.31	0.969468	1.33667
19	19a	3	sewage.sludge.	5.92	2.2907	0.20088	11.4033	0.0747302	2.28739e+08	3.06087e+09	2.10897	11.5994	8.53176	1.72552	0.7669	24.7325	77.7778	55.5556	22.2222	2.69667	200	80	0	0	0	0	400	96	100	73	700	249	5400	2739.85	2200	944.298	300	296.149	7900	3980.29	4229.29	0.503835	0.355714
19	19b	3	sewage.sludge.																		0	0	0	0	0	0	100	24	0	0	100	24	2200	599.053	300	196.064	0	0	2500	795.117	819.117	0.318047	0.24
19	19c	3	sewage.sludge.																		100	40	0	0	0	0	0	0	0	0	100	40	8200	3548.51	300	163.957	200	127.134	8700	3839.6	3879.6	0.441333	0.4
19	19d	3	sewage.sludge.																		100	40	0	0	0	0	0	0	0	0	100	40	3100	1211.49	100	123.726	0	0	3200	1335.21	1375.21	0.417254	0.4
21	21a	3	FYM	6.39	2.3705	0.20535	11.5437	0.0752357	2.69989e+08	3.58857e+09	1.55129	15.1479	9.58152	0.547515	1.55129	28.3795	322.222	288.889	33.3333	9.06778	600	240	0	0	800	5200	300	72	0	0	1700	5512	300	81.689	100	46.8445	0	0	400	128.534	5640.53	0.321334	3.24235
21	21b	3	FYM																		2200	880	0	0	2100	13650	500	120	200	146	5000	14796	3300	898.579	800	505.097	100	127.435	4200	1531.11	16327.1	0.36455	2.9592
21	21c	3	FYM																		1600	640	600	630	1800	11700	500	120	1100	803	5600	13893	800	130.321	500	203.629	100	172.751	1400	506.701	14399.7	0.361929	2.48089
21	21d	3	FYM																		200	80	100	20	1200	7800	300	72	1000	730	2800	8702	400	171.862	300	204	400	691.003	1100	1066.87	9768.87	0.969877	3.10786
22	22a	3	house-hold.compost	6.55	2.7583	0.25675	10.7431	0.0919639	3.0978e+08	3.36849e+09	0.764083	8.69144	4.68001	0.191021	0.573062	14.8996	188.889	188.889	0	3.08889	1000	400	0	0	2000	13000	0	0	0	0	3000	13400	100	68.302	400	232.045	0	0	500	300.347	13700.3	0.600693	4.46667
22	22b	3	house-hold.compost																		400	160	100	20	1900	12350	0	0	100	73	2500	12603	0	0	300	189.411	100	172.751	400	362.162	12965.2	0.905405	5.0412
22	22c	3	house-hold.compost																		400	160	100	20	1200	7800	0	0	100	73	1800	8053	0	0	600	599.399	100	249.227	700	848.626	8901.63	1.21232	4.47389
22	22s	3	house-hold.compost																		400	160	0	0	400	2600	0	0	0	0	800	2760	0	0	300	174.033	400	560.175	700	734.208	3494.21	1.04887	3.45
23	23a	3	Ca(NO3)2.	6.5	2.0507	0.17395	11.789	0.0655491	275453750	4202250000	0.539499	3.50674	4.4059	0.269749	0.629415	9.35131	122.222	88.8889	33.3333	5.26	0	0	0	0	200	1300	0	0	300	219	500	1519	0	0	0	0	100	63.5672	100	63.5672	1582.57	0.635672	3.038
23	23b	3	Ca(NO3)2.																		300	120	0	0	100	650	0	0	0	0	400	770	200	54.4593	300	204	100	98.7164	600	357.176	1127.18	0.595293	1.925
23	23c	3	Ca(NO3)2.																		700	280	0	0	200	1300	0	0	0	0	900	1580	200	36.8558	300	299.699	0	0	500	336.555	1916.56	0.67311	1.75556
23	23d	3	Ca(NO3)2.																		600	240	0	0	700	4550	900	216	0	0	2200	5006	1100	1270.04	200	81.4517	500	410.601	1800	1762.09	6768.09	0.978942	2.27545
24	24a	3	(NH4)2SO4.	6.06	1.9952	0.17054	11.6993	0.0719919	2.52826e+08	3.51187e+09	1.26585	13.0202	6.96218	0.632926	0.090418	21.9716	44.4444	22.2222	22.2222	1.16778	1600	640	500	730	300	1950	100	24	0	0	2500	3344	2900	1451.81	200	212.881	900	923.241	4000	2587.93	5931.93	0.646983	1.3376
24	24b	3	(NH4)2SO4.																		0	0	200	280	200	1300	0	0	100	73	500	1653	1100	989.656	0	0	100	63.5672	1200	1053.22	2706.22	0.877686	3.306
24	24c	3	(NH4)2SO4.																		1600	640	200	340	1000	6500	0	0	200	146	3000	7626	400	73.7116	400	290.502	100	98.7164	900	462.931	8088.93	0.514367	2.542
24	24d	3	(NH4)2SO4.																		0	0	100	110	300	1950	0	0	0	0	400	2060	500	194.821	500	340	100	98.7164	1100	633.538	2693.54	0.575943	5.15
25	25a	3	grass.hay.	6.2	2.0269	0.17417	11.6375	0.121615	6.45039e+08	5.30394e+09	0.840994	11.1198	5.41974	0.373775	0.0934438	17.8478	77.7778	77.7778	0	0.526667	600	240	0	0	100	650	0	0	100	73	800	963	800	147.423	500	315.685	100	151.717	1400	614.826	1577.83	0.439161	1.20375
25	25b	3	grass.hay.																		900	360	0	0	100	650	100	24	900	657	2000	1691	300	106.136	0	0	0	0	300	106.136	1797.14	0.353788	0.8455
25	25c	3	grass.hay.																		700	280	0	0	600	3900	0	0	0	0	1300	4180	100	18.4279	600	390.125	200	169.969	900	578.522	4758.52	0.642803	3.21538
25	25d	3	grass.hay.																		0	0	0	0	300	1950	0	0	200	146	500	2096	300	81.689	0	0	0	0	300	81.689	2177.69	0.272297	4.192
27	27a	3	Unfertilised	6.22	1.9966	0.16855	11.8457	0.0451706	136304750	3017555000	0.669304	7.26673	3.72898	0.478074	1.05176	13.1948	44.4444	44.4444	0	1.07111	1700	680	0	0	500	3250	0	0	200	146	2400	4076	300	55.2837	200	136	200	85.067	700	276.351	4352.35	0.394787	1.69833
27	27b	3	Unfertilised																		200	80	0	0	0	0	300	72	100	73	600	225	200	36.8558	0	0	200	254.871	400	291.727	516.727	0.729317	0.375
27	27c	3	Unfertilised																		1400	560	0	0	300	1950	0	0	300	219	2000	2729	2700	735.201	100	68	500	317.836	3300	1121.04	3850.04	0.339708	1.3645
27	27d	3	Unfertilised																		1000	400	200	220	200	1300	0	0	100	73	1500	1993	1700	601.44	300	189.411	100	63.5672	2100	854.418	2847.42	0.406866	1.32867
28	28a	4	(NH4)2SO4.	5.94	2.0921	0.1801	11.6163	0.0694097	2.35311e+08	3.39017e+09	0.797149	10.5401	4.96004	0.0885721	0.708577	17.0944	88.8889	55.5556	33.3333	4.26889	700	280	0	0	700	4550	0	0	400	292	1800	5122	400	35.4393	300	217.877	0	0	700	253.316	5375.32	0.36188	2.84556
28	28b	4	(NH4)2SO4.																		800	320	200	340	1300	8450	400	96	1000	730	3700	9936	400	73.7116	400	187.378	300	420.131	1100	681.221	10617.2	0.619292	2.68541
28	28c	4	(NH4)2SO4.																		1000	400	800	1360	800	5200	0	0	1000	730	3600	7690	2100	571.823	200	126.274	200	303.434	2500	1001.53	8691.53	0.400612	2.13611
28	28d	4	(NH4)2SO4.																		1600	640	500	850	600	3900	0	0	0	0	2700	5390	4900	2105.31	900	929.04	100	98.7164	5900	3133.07	8523.07	0.531028	1.9963
29	29a	4	FYM	6.38	2.4598	0.21199	11.6034	0.0586654	3.15899e+08	5.38476e+09	1.29499	11.8399	6.93747	0.462498	0.647497	21.1824	122.222	122.222	0	5.12556	100	40	100	170	1400	9100	600	144	100	73	2300	9527	3900	1379.77	1100	694.508	300	127.6	5300	2201.88	11728.9	0.415449	4.14217
29	29b	4	FYM																		1100	440	500	850	1200	7800	2600	624	700	511	6100	10225	800	147.423	0	0	100	172.751	900	320.174	10545.2	0.355749	1.67623
29	29c	4	FYM																		1400	560	0	0	700	4550	400	96	1200	876	3700	6082	2400	442.27	0	0	0	0	2400	442.27	6524.27	0.184279	1.64378
29	29d	4	FYM																		800	320	0	0	1600	10400	0	0	400	292	2800	11012	2400	679.588	600	205.109	100	127.435	3100	1012.13	12024.1	0.326495	3.93286
30	30a	4	house-hold.compost	6.51	2.8819	0.25867	11.1412	0.0667681	282203250	4226617500	0.898745	7.90896	4.31398	0.269624	0.629122	14.0204	55.5556	55.5556	0	0.39	800	320	0	0	1100	7150	0	0	600	438	2500	7908	600	163.378	0	0	0	0	600	163.378	8071.38	0.272297	3.1632
30	30b	4	house-hold.compost																		600	240	0	0	500	3250	0	0	200	146	1300	3636	2300	423.842	0	0	100	63.5672	2400	487.409	4123.41	0.203087	2.79692
30	30c	4	house-hold.compost																		600	240	0	0	200	1300	0	0	200	146	1000	1686	500	44.2992	0	0	100	63.5672	600	107.866	1793.87	0.179777	1.686
30	30s	4	house-hold.compost																		800	320	100	170	400	2600	0	0	300	219	1600	3309	2100	902.276	400	333.903	700	975.237	3200	2211.42	5520.42	0.691067	2.06812
33	33a	4	Ca(NO3)2.	6.37	2.2893	0.19175	11.939	0.051622	2.17697e+08	4.21714e+09	0.466644	12.3194	3.91981	0.746631	0.839959	18.2924	44.4444	22.2222	22.2222	2.83333	100	40	0	0	100	650	0	0	0	0	200	690	2700	2954.9	200	136	100	63.5672	3000	3154.46	3844.46	1.05149	3.45
33	33b	4	Ca(NO3)2.																		400	160	100	170	400	2600	0	0	0	0	900	2930	3000	2974.13	500	409.036	200	127.134	3700	3510.3	6440.3	0.948729	3.25556
33	33c	4	Ca(NO3)2.																		200	80	0	0	100	650	0	0	0	0	300	730	1100	902.651	500	290.056	0	0	1600	1192.71	1922.71	0.745442	2.43333
33	33d	4	Ca(NO3)2.																		400	160	0	0	0	0	200	48	0	0	600	208	2700	2604.34	700	239.294	300	299.885	3700	3143.52	3351.52	0.849601	0.346667
34	34a	4	grass.hay.	6.22	2.262	0.18881	11.9803	0.0657177	3.61688e+08	5.50367e+09	0.7518	7.23607	7.89389	0.281925	0.657825	16.8215	44.4444	44.4444	0	1.51222	1800	720	0	0	0	0	600	144	1100	803	3500	1667	1600	435.675	1300	1284.82	600	845.077	3500	2565.57	4232.57	0.733021	0.476286
34	34b	4	grass.hay.																		2600	1040	100	170	600	3900	300	72	2100	1533	5700	6715	4300	3411.84	2100	1402.5	400	560.175	6800	5374.52	12089.5	0.79037	1.17807
34	34c	4	grass.hay.																		700	280	0	0	500	3250	300	72	0	0	1500	3602	1500	787.415	200	161.348	0	0	1700	948.763	4550.76	0.558096	2.40133
34	34d	4	grass.hay.																		400	160	200	340	300	1950	0	0	100	73	1000	2523	1600	708.129	700	406.078	200	382.608	2500	1496.81	4019.81	0.598726	2.523
35	35a	4	Unfertilised	6.15	2.0615	0.17412	11.8395	0.0799538	292383000	3656900000	0.79723	9.56675	3.98615	0.177162	1.24013	15.7674	66.6667	66.6667	0	2.47	1000	400	0	0	0	0	0	0	900	657	1900	1057	2200	2082.27	200	105.184	0	0	2400	2187.46	3244.46	0.91144	0.556316
35	35b	4	Unfertilised																		1700	680	200	280	0	0	0	0	3700	2701	5600	3661	300	223.467	800	694.872	0	0	1100	918.339	4579.34	0.834854	0.65375
35	35c	4	Unfertilised																		2700	1080	500	790	200	1300	700	168	3200	2336	7300	5674	4100	3060.67	900	701.241	500	623.742	5500	4385.65	10059.7	0.797391	0.77726
35	35s	4	Unfertilised																		500	200	0	0	0	0	400	96	1300	949	2200	1245	1600	1008.23	0	0	100	151.717	1700	1159.94	2404.94	0.68232	0.565909
36	36a	4	sewage.sludge.	6.08	2.3617	0.20521	11.5087	0.0588909	2.11063e+08	3.58398e+09	3.23037	12.46	8.30667	1.01526	1.56904	26.5814	155.556	155.556	0	3.84556	300	120	100	1000	400	2600	100	24	0	0	900	3744	5700	5654.71	0	0	400	345.077	6100	5999.78	9743.78	0.983571	4.16
36	36b	4	sewage.sludge.																		300	120	0	0	200	1300	0	0	1000	730	1500	2150	9500	6056.34	400	280.385	0	0	9900	6336.73	8486.73	0.640073	1.43333
36	36c	4	sewage.sludge.																		1300	520	100	170	400	2600	500	120	900	657	3200	4067	10000	9917.62	400	338.056	300	296.149	10700	10551.8	14618.8	0.986152	1.27094
36	36d	4	sewage.sludge.																		0	0	100	1000	100	650	1200	288	0	0	1400	1938	14500	14378.8	1700	977.769	700	690.688	16900	16047.3	17985.3	0.949543	1.38429

## Sheet: Metadata
Meta data
Variable from dataset	Notes
Plot	Plot unique ID
ID	Specific number used when several samples were taken in the same plot
Block	Block ID (1-4)
Treatment	Type of fertilizer in the plot. FYM = farmyard manure
pH_2014	Soil pH, measured by the field staff and made available to us on request. Processed mean values can be found at https://www.slu.se/institutioner/mark-miljo/forskning/vaxtnaringslara-/vaxtnaring/langliggande-vaxtnaringsforsok/r3-0130/.
TotC_2014	Total soil carbon, measured by the field staff and made available to us on request. Processed mean values can be found at https://www.slu.se/institutioner/mark-miljo/forskning/vaxtnaringslara-/vaxtnaring/langliggande-vaxtnaringsforsok/r3-0130/.
TotN_2014	Total soil nitrogen, measured by the field staff and made available to us on request. Processed mean values can be found at https://www.slu.se/institutioner/mark-miljo/forskning/vaxtnaringslara-/vaxtnaring/langliggande-vaxtnaringsforsok/r3-0130/.
C.N_2014	Total C/Total N ratio in soil
Fun.Bac	ratio of fungi to bacteria
Fun(cop/gDW)	abundance of fungi expressed as no. of fungal copies per g dw soil
Bact(cop/gDW)	abundance of bacteria expressed as no. of bacterial copies per g dw soil
RF	root-feeding nematodes (no/ g dw soil)
FF	fungal-feeding nematodes (no/ g dw soil)
BF	bacterial-feeding nematodes (no /g dw soil)
OM	omnivorous nematodes (no/g dw soil)
PRED	predatory nematodes (no /g dw soil)
Tot_nem	total abundance of nematodes (no/g dw soil)
Ew.m2	number of earthworms per square meter
A.tot.m2	number of earthworms belonging to Aporrectodea per square meter
L.tot.m2	number of earthworms belonging to Lumbricus per square meter
DW_Ew_g.m2	dry weight of earthworms per square meter (g)
Mite.juv.1m2	number of juvenile mites per square meter
DW.Mite.juv.1m2	dry weight of juvenile mites per square meter (µg)
M.Ori.Tot.1m2	number of oribatid mites per square meter
DW.Ori.Tot.1m2	dry weight of oribatid mites per square meter (µg)
M.Meso.1m2	number of mesostigmatid mites per square meter
DW.M.Meso.1m2	dry weight of mesostigmatid mites per square meter (µg)
M.Prostig.1m2	number of prostigmatid mites per square meter
DW.M.Prostig.1m2	dry weight of prostigmatid mites per square meter (µg)
M.Astig.1m2	number of astigmatid mites per square meter
DW.M.Astig.1m2	dry weight of astigmatid mites per square meter (µg)
Mite.Tot.1m2	total number of mites per square meter
DW.Mites.tot.1m2	total dry weight of mites per square meter (µg)
C.PoduTot.1m2	number of Podumorpha (springtails) per square meter
DW.PoduTot.1m2	dry weight of Podumorpha (springtails) per square meter (µg)
C.EntomoTot.1m2	number of Entomobryomorpha (springtails) per square meter
DW.C.EntomoTot.1m2	dry weight of Entomobryomorpha (springtails) per square meter (µg)
C.SympTot.1m2	number of Symphyleona (springtails) per square meter
DW.C.SympTot.1m2	dry weight of Symphyleona (springtails) per square meter (µg)
CollTot.1m2	total number of springtails per square meter
DW.Coll.1m2	total dry weight of springtails per square meter (µg)
DW.Meso	total biomass of mesofauna (mites + springtails combined) (µg)
CollCWB	community weighted mean biomass (tot dry weight/tot abundance) of springtails (µg/ind)
MitesCWB	community weighted mean biomass (tot dry weight/tot abundance) of mites (µg/ind)
